## CORRECTION

## Paradox of the drinking-straw model of the butterfly proboscis

Chen-Chih Tsai, Daria Monaenkova, Charles Beard, Peter Adler and Konstantin Kornev

There was an error published in *J. Exp. Biol.* **217**, 2130-2138. Eqns A12 and A13 in the Appendix were cropped. The online pdf and full-text versions (but not the print version) of the article have been corrected. The correct versions of the equations also appear below.

$$P_p = \frac{1}{\left(\frac{ab}{a+b} - \frac{r^4}{L_p - L}\right)} \left[ \frac{r^4 P_c}{L_p - L} + \frac{\rho g r^4}{L_p - L} (L_p - L) - \frac{\rho g ab L_p}{a+b} \right]. \quad (\text{A12})$$

$$\frac{dL}{dt} = \frac{r^2}{8\eta} \frac{(P_c - \rho g L)}{L - L_p + \frac{r^4(a+b)}{ab}}. \quad (\text{A13})$$

We apologise to the authors and readers for this error.
